# Supplementary material for: Thrombectomy for acute ischemic stroke patients with isolated distal internal carotid artery occlusion: a retrospective observational study
Source: PubMed Central journal article supplement (PMC8041676; doi:10.1007/s00234-020-02550-5), 2020-10-07
Supplement: 234_2020_2550_MOESM2_ESM.pdf [file 234_2020_2550_MOESM2_ESM.pdf]

|                                                                                 | <b>EVT only<br/>[N=9]</b> | <b>IVT+EVT [N=32]</b>   | <b>IVT only [N=6]</b> | <b>Supportive care<br/>only [N=4]</b> |
|---------------------------------------------------------------------------------|---------------------------|-------------------------|-----------------------|---------------------------------------|
| <b>Mean age – yr (SD)</b>                                                       | 63 (17)                   | 63 (15)                 | 84 (11)               | 82 (9)                                |
| <b>Sex – n(%) male</b>                                                          | 4 (78)                    | 23 (72)                 | 4 (67)                | 3 (75)                                |
| <b>Baseline NIHSS – median (IQR) [known in]</b>                                 | 20 (11-22)<br>[N=8]       | 14 (8-21)               | 17 (13-20)            | 19 (14-23)                            |
| <b>Left hemisphere – n(%)</b>                                                   | 6 (67)                    | 24 (75)                 | 3 (50)                | 2 (50)                                |
| <b>Hypertension – n(%)</b>                                                      | 4 (44)                    | 8 (25)                  | 3 (50)                | 1 (25)                                |
| <b>Atrial fibrillation – n(%)</b>                                               | 3 (33)                    | 3 (9)                   | 2 (33)                | 2 (50)                                |
| <b>Myocardial infarction – n(%)</b>                                             | 3 (33)                    | 5 (16)                  | 2 (33)                | 0 (0)                                 |
| <b>Diabetes mellitus – n(%)</b>                                                 | 1 (11)                    | 4 (13)                  | 1 (67)                | 2 (67)                                |
| <b>Blood glucose level (mmol/l) – median (IQR) [known in]</b>                   | 6.4 (5.9-6.8)<br>[N=8]    | 6.4 (5.7-7.6)<br>[N=29] | 6.5 (5.9-7.6)         | 9.5 (6.0-10.1)                        |
| <b>Smoking history – n(%)</b>                                                   | 3 (33)                    | 9 (28)                  | 0 (0)                 | 1 (25)                                |
| <b>Systolic blood pressure at baseline (mmHg) – median (IQR) [known in]</b>     | 144 (140-175)             | 155 (126-170)<br>[N=31] | 143 (87-154)          | 126 (87-168)                          |
| <b>Diastolic blood pressure at baseline (mmHg) – median (IQR)</b>               | 90 (77-98)                | 84 (72-94) [N=31]       | 75 (49-86)            | 85 (73-116)                           |
| <b>Onset-to-presentation at EVT-center time (min) – median (IQR) [known in]</b> | 126 (56-215)<br>[N=8]     | 62 (47-105)<br>[N=25]   | 64 (43-94)            | 101 (75-101)<br>[N=3]                 |
| <b>Door-to-needle time (min) – median (IQR) [known in]</b>                      | NA                        | 25 (20-36) [N=27]       | 34 (24-56)            | NA                                    |
| <b>Functional independence (mRS 0-2) at 90 days - n(%) [known in]</b>           | 2 (22) [N=8]              | 19 (59) [N=30]          | 1 (17)                | 0 (0)                                 |
| <b>Successful reperfusion after EVT – n(%)</b>                                  | 5 (56)                    | 18 (56)                 | NA                    | NA                                    |
| <b>Mortality at 90 days – n(%) [known in]</b>                                   | 3 (33) [N=8]              | 7 (22) [N=31]           | 2 (33)                | 1 (25)                                |
| <b>Delta-NIHSS at 90 days – median (IQR) [known in]</b>                         | 2 (1-11) [N=8]            | 7 (0-11) [N=30]         | 3 (3-7)               | 0 (0-6)                               |
| <b>sICH – n(%)</b>                                                              | 0 (0)                     | 2 (6)                   | 1 (17)                | 0 (0)                                 |
| <b>Patency of the infraclinoidal ICA – n(%)</b>                                 | 3 (33)                    | 2 (6)                   | 4 (67)                | 4 (100)                               |
| <b>Patency of the supraclinoidal ICA – n(%)</b>                                 | 2 (22)                    | 11 (34)                 | 4 (67)                | 3 (75)                                |
| <b>Patency of the PCOM – n(%)</b>                                               | 5 (56)                    | 9 (28)                  | 4 (67)                | 2 (50)                                |
| <b>Patency of the AChA – n(%)</b>                                               | 6 (67)                    | 12 (38)                 | 1 (17)                | 2 (50)                                |
| <b>Patency of the ACOM – n(%)</b>                                               | 8 (89)                    | 30 (94)                 | 6 (100)               | 4 (100)                               |
| <b>Patency of the ophthalmic artery – n(%)</b>                                  | 0 (0)                     | 14 (44)                 | 1 (17)                | 2 (50)                                |
| <b>Plexus enhancement – n(%)</b>                                                | 8 (89)                    | 27 (84)                 | 1 (17)                | 4 (100)                               |

|                                                      |             |              |               |              |
|------------------------------------------------------|-------------|--------------|---------------|--------------|
| <b>Hypodensity on NCCT – n(%)</b>                    | 1 (11)      | 9 (28)       | 2 (33)        | 3 (75)       |
| <b>ASPECTS at baseline – median (IQR) [known in]</b> | 9 (8-10)    | 10 (9-10)    | 10 (8-10)     | 8 (8-9)      |
| <b>CBV reduction on CTP – n(%) [known in]</b>        | 0 (0) [N=2] | 5 (63) [N=8] | 3 (60) [N=5]  | 2 (50) [N=2] |
| <b>CBF reduction on CTP – n(%) [known in]</b>        | 0 (0) [N=2] | 6 (75) [N=8] | 5 (100) [N=5] | 2 (50) [N=2] |
| <b>CBF/CBV mismatch on CTP – n(%) [known in]</b>     | 0 (0) [N=2] | 5 (63) [N=8] | 2 (40) [N=5]  | 1 (50) [N=2] |

**Online Resource 2 – Baseline, procedural and outcome, and imaging variables per EVT and/or IVT treatment.** *AChA=anterior choroidal artery, ACOM=anterior communicating artery, CBF=cerebral blood flow, CBV=cerebral blood volume, CTP=CT perfusion, EVT=endovascular treatment, ICA=internal carotid artery, IVT=intravenous thrombolysis, IQR=interquartile range, M1=first segment of middle cerebral artery, min=minutes, mRS=modified Rankin Scale score, n denotes the number of patients, NA=not applicable/available, NIHSS=national institute of health stroke scale, SD=standard deviation, sICH=symptomatic intracranial haemorrhage. If the [known in] number is not shown, the variable was known in all patients.*
