# Supplementary material for: Thrombectomy for acute ischemic stroke patients with isolated distal internal carotid artery occlusion: a retrospective observational study
Source: PubMed Central journal article supplement (PMC8041676; doi:10.1007/s00234-020-02550-5), 2020-10-07
Supplement: 234_2020_2550_MOESM3_ESM.pdf [file 234_2020_2550_MOESM3_ESM.pdf]

|                                                                              | <b>EVT [N=41]</b>       | <b>Non-EVT [N=10]</b> | <b>Registry overall [N=3180]</b> |
|------------------------------------------------------------------------------|-------------------------|-----------------------|----------------------------------|
| <b>No access</b> – n(%; 95%CI)                                               | 6(15; 7-28)             | NA                    | 185(6; 5-7)<br>[N=3165]          |
| <b>Aspiration first</b> – n(%; 95%CI) [known in]                             | 5(17; 8-35) [N=29]      | NA                    | 676(21; 20-23)<br>[N=3165]       |
| <b>Stent retriever first</b> – n(%; 95%CI) [known in]                        | 24(83; 65-92)<br>[N=29] | NA                    | 1776(56; 54-58)<br>[N=3165]      |
| <b>Intracranial atherosclerotic disease present</b> – n(%; 95%CI) [known in] | 21(53; 38-67)<br>[N=40] | 5(50; 24-76)          | 1831(60; 59-62)<br>[N=3036]      |
| <b>Emergent carotid stenting</b> – n(%; 95%CI) [known in]                    | 4(11; 4-25) [N=36]      | NA                    | 175(6; 5-7)<br>[N=2989]          |
| <b>Clot migration</b> – n(%; 95%CI)                                          | 8(20; 10-34)            | NA                    | 554 (21; 19-22)<br>[N=2664]      |

**Supplementary Table 2 Procedural data** EVT=endovascular treatment. If the [known in] number is not shown, the variable was known in all patients.
